# Supplementary material for: Efficacy of nab‑paclitaxel vs. Gemcitabine in combination with S‑1 for advanced pancreatic cancer: A multicenter phase II randomized trial
Source: PubMed Central journal article supplement — Oncol Lett. 2024 Feb 19;27(4):161. doi: 10.3892/ol.2024.14293 (PMC10915801; doi:10.3892/ol.2024.14293), 2024-02-19

Figure S1. Waterfall plot of the maximal responses of patients with pancreatic cancer. The dashed line represents a 30% reduction from baseline in the sum of the longest target lesion diameters during treatment. AS, nab-paclitaxel plus S-1; GS, gemcitabine plus S-1.

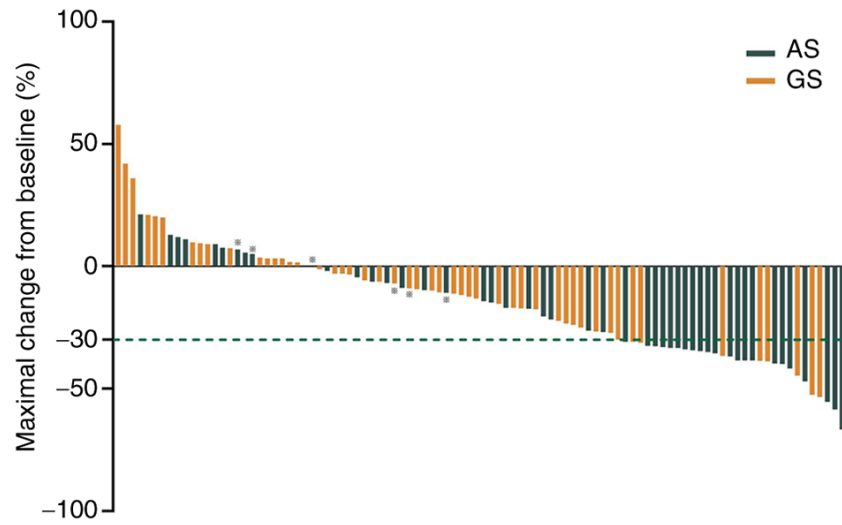

Supplement: Supplementary_Data1.pdf [file Supplementary_Data1.pdf]
