# Supplementary material for: Efficacy of nab‑paclitaxel vs. Gemcitabine in combination with S‑1 for advanced pancreatic cancer: A multicenter phase II randomized trial
Source: PubMed Central journal article supplement — Oncol Lett. 2024 Feb 19;27(4):161. doi: 10.3892/ol.2024.14293 (PMC10915801; doi:10.3892/ol.2024.14293), 2024-02-19
Supplement: Supplementary_Data2.pdf [file Supplementary_Data2.pdf]

Table SI. Chemotherapy completion.

| Cycles                         | AS group (n=49) | GS group (n=52)  |
|--------------------------------|-----------------|------------------|
| Overall completed cycles, n    | 373.5           | 410              |
| Number of cycles, median (IQR) | 7 (2.50-11.0)   | 6.5 (3.25-12.75) |
| Number of cycles, n (%)        |                 |                  |
| 1.0                            | 46 (93.87)      | 52 (100.00)      |
| 2.0                            | 42 (85.71)      | 49 (94.23)       |
| 6.0                            | 30 (61.22)      | 30 (57.69)       |
| 12.0                           | 10 (20.41)      | 11 (21.15)       |
| 18.0                           | 5 (10.20)       | 5 (9.61)         |
| 23.0                           | 1 (2.04)        | 0 (0)            |

AS, nab-paclitaxel plus S-1; GS, gemcitabine plus S-1; IQR, interquartile range.

Table SII. Post-discontinuation anticancer therapies.

| Concomitant therapies                | N (%)           |                 |
|--------------------------------------|-----------------|-----------------|
|                                      | AS group (n=49) | GS group (n=52) |
| Second-line                          | 29 (59.18)      | 34 (65.38)      |
| Gemcitabine-based regimen            | 16 (32.65)      | 0 (0)           |
| Nab-paclitaxel-based regimen         | 2 (4.08)        | 19 (36.54)      |
| Irinotecan/oxaliplatin-based regimen | 2 (4.08)        | 7 (13.46)       |
| Radiotherapy-based regimen           | 4 (8.16)        | 4 (7.69)        |
| Traditional Chinese medicine         | 3 (6.12)        | 2 (3.85)        |
| Other                                | 2 (4.08)        | 2 (3.85)        |
| Third-line                           | 8 (16.33)       | 7 (13.46)       |
| Gemcitabine-based regimen            | 3 (6.12)        | 0 (0)           |
| Nab-paclitaxel-based regimen         | 0 (0)           | 2 (3.85)        |
| Irinotecan-based regimen             | 2 (4.08)        | 0 (0)           |
| Nab-paclitaxel-based regimen         | 0 (0)           | 2 (3.85)        |
| Fluorouracil-based regimen           | 2 (4.08)        | 0 (0)           |
| Other                                | 1 (2.04)        | 3 (5.77)        |

AS, nab-paclitaxel plus S-1; GS, gemcitabine plus S-1.
